# Supplementary material for: Development of high-copy number plasmids in Pseudoalteromonas haloplanktis TAC125
Source: PubMed Central journal article supplement (PMC10033558; doi:10.1007/s00253-023-12448-w), 2023-03-13
Supplement: 253_2023_12448_MOESM1_ESM.pdf [file 253_2023_12448_MOESM1_ESM.pdf]

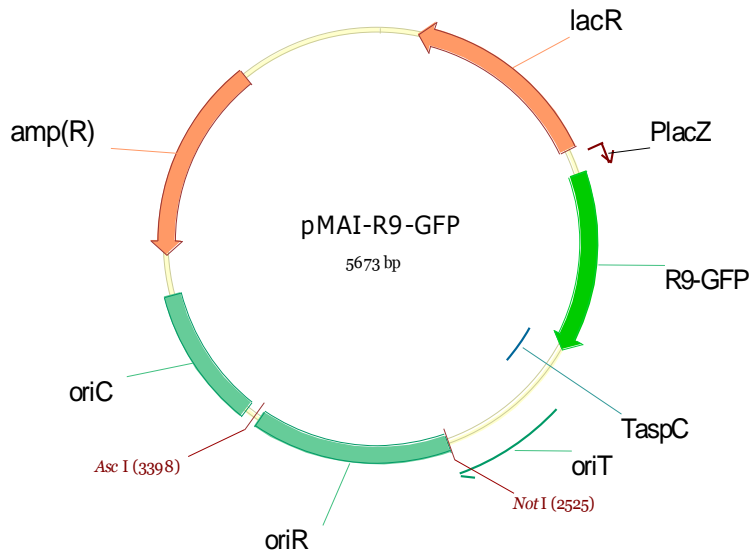

14

15 **Fig. S1 Map of the pMAI79-R9-gfp plasmid.** The two unique restriction sites (NotI and Ascl) introduced  
 16 upstream and downstream of the OriR sequence for the construction of the pMAI79-R9-gfp vector are  
 17 highlighted in red. The map illustrates the genetic structure of the plasmid backbone including the pMtBL-  
 18 derived replication origin for the maintenance in *PhTAC125* (OriR), the promoter (*PlacZ*), and the  
 19 regulatory sequence (*PhlacR*) of lac operon recovered from the *PhTAE79*, the transcriptional terminator of  
 20 the *PhTAC125 aspC* gene (*TaspC*), the conjugational DNA transfer origin (OriT), the  $\beta$ -lactamase encoding  
 21 gene (*amp<sup>R</sup>*) and the pUC18-derived replication origin for the propagation in *E. coli* (OriC).

22

23

24

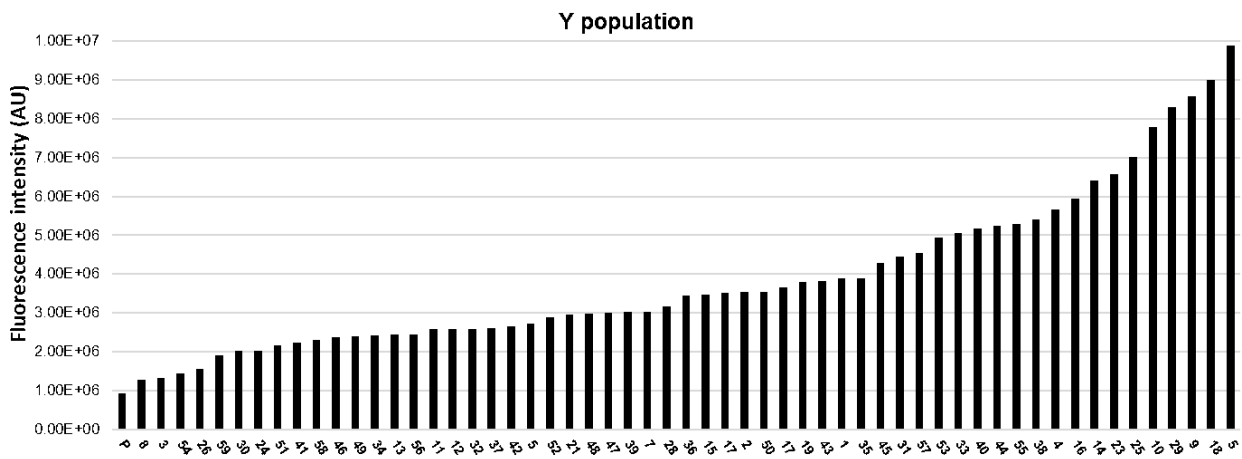

25

26 **Fig. S2 Analysis of the R9-GFP expression by spectrofluorimetry.** 60 clones of the Y population were  
 27 randomly selected, cultivated in 96 deep well plates filled with the GG medium at 15°C, and harvested after  
 28 24 h from induction. The fluorescence of the progenitor (P) and the clones indicated on the x-axis are  
 29 reported in arbitrary units (AU) as mean  $\pm$  SD, n = 3.

30

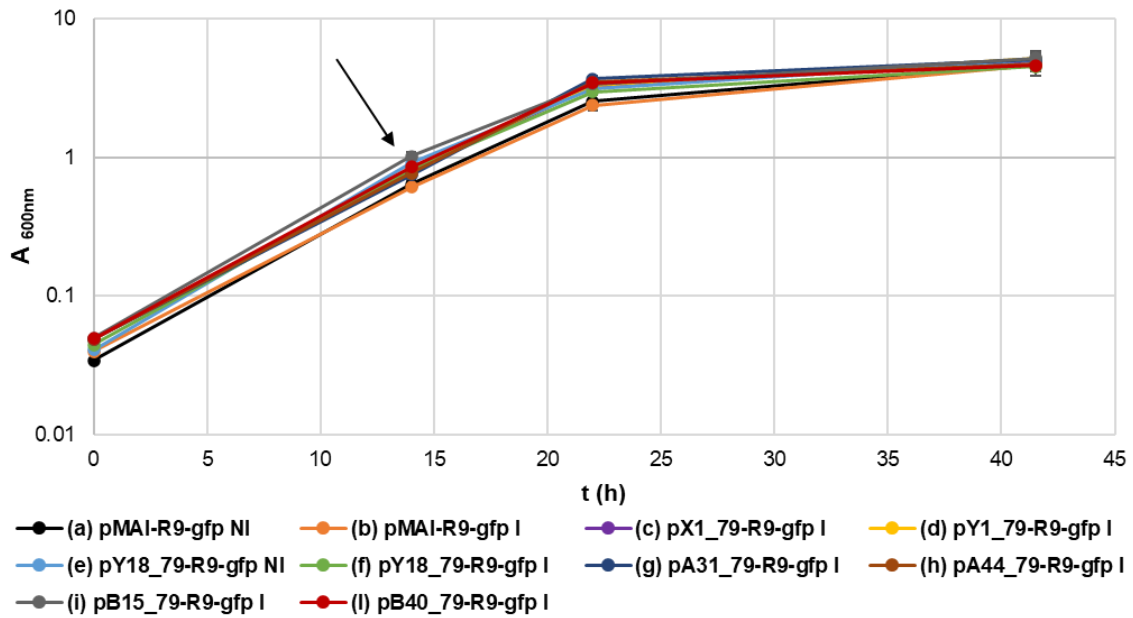

31

32 **Fig. S3 Growth curves of KrPL harboring the original plasmid (*pMAI-R9-gfp*) and the high-copy**  
 33 **plasmids.** The recombinant cells were grown in the GG medium at 15 °C. Growth curves of non-induced  
 34 cells harboring *pMAI-R9-gfp* (a) and *pY18\_79-R9-gfp* (e). Growth curves of induced cells (5 mM IPTG)  
 35 harboring *pMAI-R9-gfp* (b), *pX1\_79-R9-gfp* (c), *pY1\_79-R9-gfp* (d), *pY18\_79-R9-gfp* (f), *pA31\_79-R9-gfp*  
 36 (g), *pA44\_79-R9-gfp* (h), *pB15\_79-R9-gfp* (i), and *pB40\_79-R9-gfp* (l). The moment of the induction is  
 37 represented with a black arrow.

38

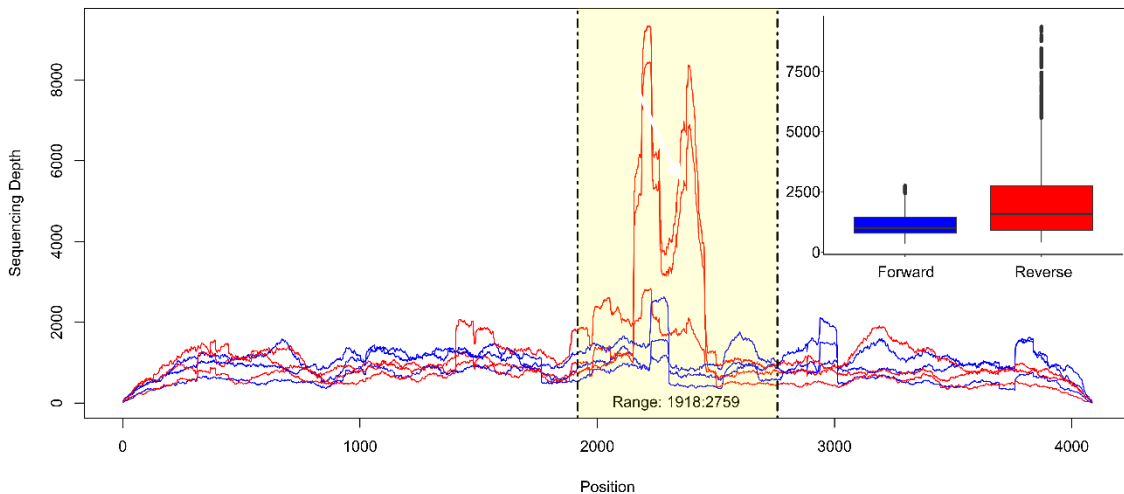

39

40 **Fig. S4 Display of RNA-Seq data.** Data from pMtBL transcriptome, the total coverage is displayed as a  
 41 plot showing nucleotide-level sequence depth for the forward (blue) and reverse strand (red). The highlight  
 42 focuses on OriR region, which stretches from nucleotides 1918 to 2759. Boxplot in the inset shows the  
 43 quartiles of total forward (blue, mean: 1008.218, SD: 420.3342) and total reverse (red, mean: 2242.505,  
 44 SD: 2123.815) strand sequencing depths for the highlighted region.

45

**Table S1 List of bacterial strains, plasmids, and primers used in this study.**

| Strain                           | Relevant characteristics                                                                                                        | References or Source               |
|----------------------------------|---------------------------------------------------------------------------------------------------------------------------------|------------------------------------|
| <b><i>E. coli</i> strains</b>    |                                                                                                                                 |                                    |
| <i>DH5α</i>                      | [supE44, ΔlacU169 (φ80 lacZΔM15) hsdR17, recA1, endA1, gyrA96, thi-1, relA1]                                                    | Lab stock                          |
| S17-1 ( <i>λpir</i> )            | thi, pro, hsd(r- m+) recA::RP4-2-TCr::Mu Kmr::Tn7 Tpr Smr λpir                                                                  | Tascon et al. 1993                 |
| XL10-Gold Ultracompetent Cells   | TetR Δ(mcrA)183 Δ(mcrCB-hsdSMR-mrr)173 endA1 supE44 thi-1 recA1 gyrA96 relA1 lac Hte [F' proAB lacIqZΔM15 Tn10 (TetR) Amy CamR] | Lab stock                          |
| <b><i>PhTAC125</i> strains</b>   |                                                                                                                                 |                                    |
| <i>PhTAC125 wt</i>               | Possesses two endogenous plasmids                                                                                               | Médigue et al. 2005 and CIP 108707 |
| KrPL                             | <i>PhTAC125</i> cured strain without pMtBL plasmid                                                                              | Lab stock (Unpublished data)       |
| <b>Plasmid</b>                   |                                                                                                                                 |                                    |
| pP79- <i>R9-gfp</i>              | Expression vector with <i>PhTAE79 lacZ</i> regulative sequences producing enhanced GFP                                          | Colarusso et al. 2020              |
| pMAI79- <i>R9-gfp</i>            | pP79- <i>R9-gfp</i> vector, introducing two unique restriction sites, <i>NotI</i> and <i>AscI</i>                               | This work                          |
| <b>Primer name</b>               |                                                                                                                                 |                                    |
| <b>Sequence (5' - 3')</b>        |                                                                                                                                 |                                    |
| <b>Multiple-site mutagenesis</b> |                                                                                                                                 |                                    |
| Left OriR <i>NotI</i> Fw         | CGGAAAAGATCCGTCGATTGCGGCCGCTTATTTAACATAAAAAAC                                                                                   |                                    |
| Right OriR <i>AscI</i> Rv        | TCAATTCATGTGAGCAAAAAGGCGCGCCAAAGGCCAGGAACCGTAA                                                                                  |                                    |
| <b>Random mutagenesis</b>        |                                                                                                                                 |                                    |
| mut pP79- <i>R9-gfp</i> Fw       | GAAAAGATCCGTCGATTGCGGCCGC                                                                                                       |                                    |
| mut pP79- <i>R9-gfp</i> Rv       | GTTCTGGCCTTTGGCGCGCCTTT                                                                                                         |                                    |
| <b>Quantitative PCR</b>          |                                                                                                                                 |                                    |
| <i>PSHAa2051</i> Fw              | AACCGCACACAGACCCGAA                                                                                                             |                                    |
| <i>PSHAa2051</i> Rv              | AACGCACATTGGCATGACTGG                                                                                                           |                                    |
| <i>R9-gfp</i> Fw                 | GGAGAGGGTGAAGGTGATGCT                                                                                                           |                                    |
| <i>R9-gfp</i> Rv                 | GGTCAGAGTAGTGACAAGTGTGG                                                                                                         |                                    |
| <b>Deletions</b>                 |                                                                                                                                 |                                    |
| OriR_BsiWI Fw                    | GGCCGTACGGAAGAATACTTTTCAGATGAGTT                                                                                                |                                    |
| OriR_BsiWI Rv                    | CGGCGTACGAATTCCTGCAAGCATACT                                                                                                     |                                    |
| OriR_Nsil Fw                     | GGCCGTACGGAAGAATACTTTTCAGATGAGTT                                                                                                |                                    |
| OriR_Nsil Rv                     | CGGCGTACGAATTCCTGCAAGCATACT                                                                                                     |                                    |
| OriR_ <i>NotI</i> Fw             | CTCGCAGAGCAGGATCCCCGTTGAG                                                                                                       |                                    |
| OriR_ <i>AscI</i> Rv             | CGCGGCGCGCCTGTTTTACTTTTTAA                                                                                                      |                                    |

47 **Table S2 Free energy values (kcal/mol) of RNA and DNA secondary structures in the selected**  
 48 **mutants compared to wild-type OriR were estimated with the Mfold tool**

| Sample           | RNA structure                                       |                                                      | DNA structure                                       |                                                      |
|------------------|-----------------------------------------------------|------------------------------------------------------|-----------------------------------------------------|------------------------------------------------------|
|                  | Stem-loop I<br>Free energy<br>minimum<br>(kcal/mol) | Stem-loop II<br>Free energy<br>minimum<br>(kcal/mol) | Stem-loop I<br>Free energy<br>minimum<br>(kcal/mol) | Stem-loop II<br>Free energy<br>minimum<br>(kcal/mol) |
| <b>wild-type</b> | -4.12                                               | -17.45                                               | -3.50                                               | -14.67                                               |
| <b>X1</b>        | -3.81                                               | /                                                    | -1.60                                               | /                                                    |
| <b>Y1</b>        | /                                                   | -11.66                                               | /                                                   | -9.24                                                |
| <b>Y18</b>       | /                                                   | -11.47                                               | /                                                   | -10.52                                               |
| <b>A31</b>       | /                                                   | -19.57                                               | /                                                   | -16.05                                               |
| <b>A44</b>       | -2.57                                               | /                                                    | -1.75                                               | /                                                    |
| <b>B15</b>       | -3.08                                               | -11.77                                               | -2.92                                               | -10.40                                               |
| <b>B40</b>       | -2.69                                               | -11.26                                               | -2.07                                               | -9.64                                                |
